# Supplementary material for: Just a Fragment of Undescribed Diversity: Twenty New Oriental and Palearctic Species of Sciaroidea (Diptera), including DNA Sequence Data and Two New Fossil Genera
Source: MDPI journal article supplement (doi:10.3390/insects13010019), 2021-12-23
Supplement: s1 [file s1]

Table S1. List of specimens used for DNA extraction, with GenBank accession numbers

| Species                                                | Voucher code | Sampling locality and year | COI      | 28S        | 16S      |
|--------------------------------------------------------|--------------|----------------------------|----------|------------|----------|
| <i>Asioditomyia bruneicola</i> <b>sp. nov.</b>         | JSD5         | Brunei, 2014               | KT316838 | KP288793   | -        |
|                                                        | JSD5B        | Brunei, 2014               | OL743128 | -          | -        |
| <i>Asioditomyia japonica</i> (Sasakawa, 1963)          | JSD10        | Japan, 2015                | OL743144 | OL741620   | -        |
| <i>Asioditomyia lacii</i> <b>sp. nov.</b>              | JSTW38       | Taiwan, 2018               | OL743120 | OL741621   | -        |
| <i>Bibio marci</i> (Linnaeus, 1758)                    | JSOUT1       | Czech Republic, 2013       | KT316846 | KJ136761.1 | -        |
| <i>Bolitophila nikolae</i> Ševčík <b>sp. nov.</b>      | JSBN20       | Taiwan, 2019               | OL743127 | -          | -        |
| <i>Catocha angulata</i> Jaschhof, 2009                 | JSC26        | Slovakia, 2014             | KT316837 | -          | KP288711 |
| <i>Catocha brachycornis</i> (Spungis & Jaschhof, 2000) | JSC86        | Estonia, 2015              | MG684831 | -          | N/A      |
| <i>Catocha incisa</i> Jaschhof, 2009                   | JSC84        | Czech Republic, 2016       | MG684811 | -          | MG684522 |
|                                                        | JSTW32B      | Taiwan, 2019               | OL743123 | -          | OL711947 |
| <i>Catocha jingfui</i> <b>sp. nov.</b>                 | JSTW32D      | Taiwan, 2019               | OL743140 |            |          |
| <i>Catocha latipes</i> Haliday, 1833                   | JSBA51       | Czech Republic, 2020       | OL743121 | -          | OL711945 |
|                                                        | JSTW32I      | Taiwan, 2019               | OL743124 | -          | OL711948 |
| <i>Catocha manmiao</i> <b>sp. nov.</b>                 | JSTW32L      | Taiwan, 2019               | OL743137 | -          | -        |
|                                                        | JSTW32       | Taiwan, 2019               | OL743122 | -          | OL711946 |
| <i>Catocha shengfengi</i> <b>sp. nov.</b>              | JSTW32C      | Taiwan, 2019               | OL743136 | -          | -        |
| <i>Catotricha subobsoleta</i> (Alexander, 1924)        | JSOUT42      | USA, 2014                  | KT316873 | -          | MG554124 |
| <i>Celebesomyia inocellata</i> Saigusa, 1973           | JSD8         | Indonesia, 2007            | OL743119 | OL741618   | -        |
|                                                        | JSK59        | Brunei, 2015               | MT446924 | -          | -        |
| <i>Chetoneura davidi</i> <b>sp. nov.</b>               | JSK59B       | Brunei, 2014               | OL743129 | -          | -        |
|                                                        | JSTW28B      | Taiwan, 2018               | OL743134 | -          | -        |
| <i>Diadocidia pseudospinusola</i> <b>sp. nov.</b>      | JSTW28       | Taiwan, 2019               | OL743133 | -          | -        |
|                                                        | JSBA46       | Thailand, 2014             | OL743118 | OL741615   | -        |
| <i>Ditomyia asiatica</i> <b>sp. nov.</b>               | JSBA46D      | Thailand, 2014             | OL743126 | -          | -        |
|                                                        | JSSJ3        | Czech Republic, 2010       | -        | KJ136770   | -        |
| <i>Ditomyia fasciata</i> (Meigen, 1818)                | JSDITFAS     | Czech Republic, 2013       | MT446886 | -          | -        |
| <i>Ditomyia macroptera</i> Winnertz, 1852              | JSD1A        | Slovakia, 2013             | OL743141 | OL741616   | -        |
| <i>Euceroptatus mantici</i> <b>sp. nov.</b>            | JSBA24       | Thailand, 2017             | MT446879 | -          | -        |
| <i>Hadroneura martini</i> <b>sp. nov.</b>              | JSTW25       | Taiwan, 2019               | OL743139 | -          | -        |
| <i>Lestremia cinerea</i> Macquart, 1826                | JSOUT6       | Czech Republic, 2014       | KJ136765 | -          | KJ136728 |
| <i>Nepaetricha sikorai</i> <b>sp. nov.</b>             | JSBA25A      | Thailand, 2017             | MT446880 | -          | -        |

|                                               |           |                     |          |          |   |
|-----------------------------------------------|-----------|---------------------|----------|----------|---|
| <i>Nervijuncta</i> sp.                        | JSD11     | New Zealand, 2016   | MT446884 | MT446784 | - |
| <i>Paratinia furcata</i> <b>sp. nov.</b>      | JSPAR-SKB | Slovakia, 2017      | OL743130 | -        | - |
| <i>Paratinia sciarina</i> Mik, 1874           | JSS6      | Slovakia, 2016      | KC435658 | -        | - |
| <i>Penthetria funebris</i> Meigen, 1804       | JSOUT14   | Slovakia, 2014      | KT316858 | KP288804 | - |
| <i>Planetella taiwanensis</i> <b>sp. nov.</b> | JSPLA5    | Taiwan, 2016        | OL743131 | -        | - |
| <i>Platyceridion yunfui</i> <b>sp. nov.</b>   | JSK81A    | China, 2016         | MT446937 | -        | - |
| <i>Rhipidita</i> sp.                          | JSD9      | French Guiana, 2012 | OL743143 | OL741619 | - |
| <i>Setostylus fangshuoi</i> <b>sp. nov.</b>   | JSTW36    | Taiwan, 2019        | MT446958 | -        | - |
|                                               | JSTW36B   | Taiwan, 2019        | OL743138 | -        | - |
| <i>Symmerus annulatus</i> (Meigen, 1830)      | JSD2      | Slovakia, 2012      | KX453757 | KX453708 | - |
| <i>Symmerus kubani</i> Sevcik, 2000           | JSD4      | Thailand, 2007      | OL743142 | OL741617 | - |
| <i>Symmerus nobilis</i> Lackschewitz, 1937    | JSB3      | Slovakia, 2012      | KT316831 | KJ136751 | - |
| <i>Symmerus pectinatus</i> Saigusa, 1966      | JSTW46    | Taiwan, 2019        | OL743125 | OL741622 | - |
| <i>Terocelion adami</i> <b>sp. nov.</b>       | JSTW31    | Taiwan, 2019        | OL743135 | -        | - |
